# Supplementary material for: Quantitative profiling of m6A at single base resolution across the life cycle of rice and Arabidopsis
Source: Springer Nature journal article supplement (doi:10.1038/s41467-024-48941-7), 2024-06-07
Supplement: MOESM1 [file 41467_2024_48941_MOESM1_ESM.pdf › 41467_2024_48941_MOESM1_ESM.pdf]

## Supplementary Figures

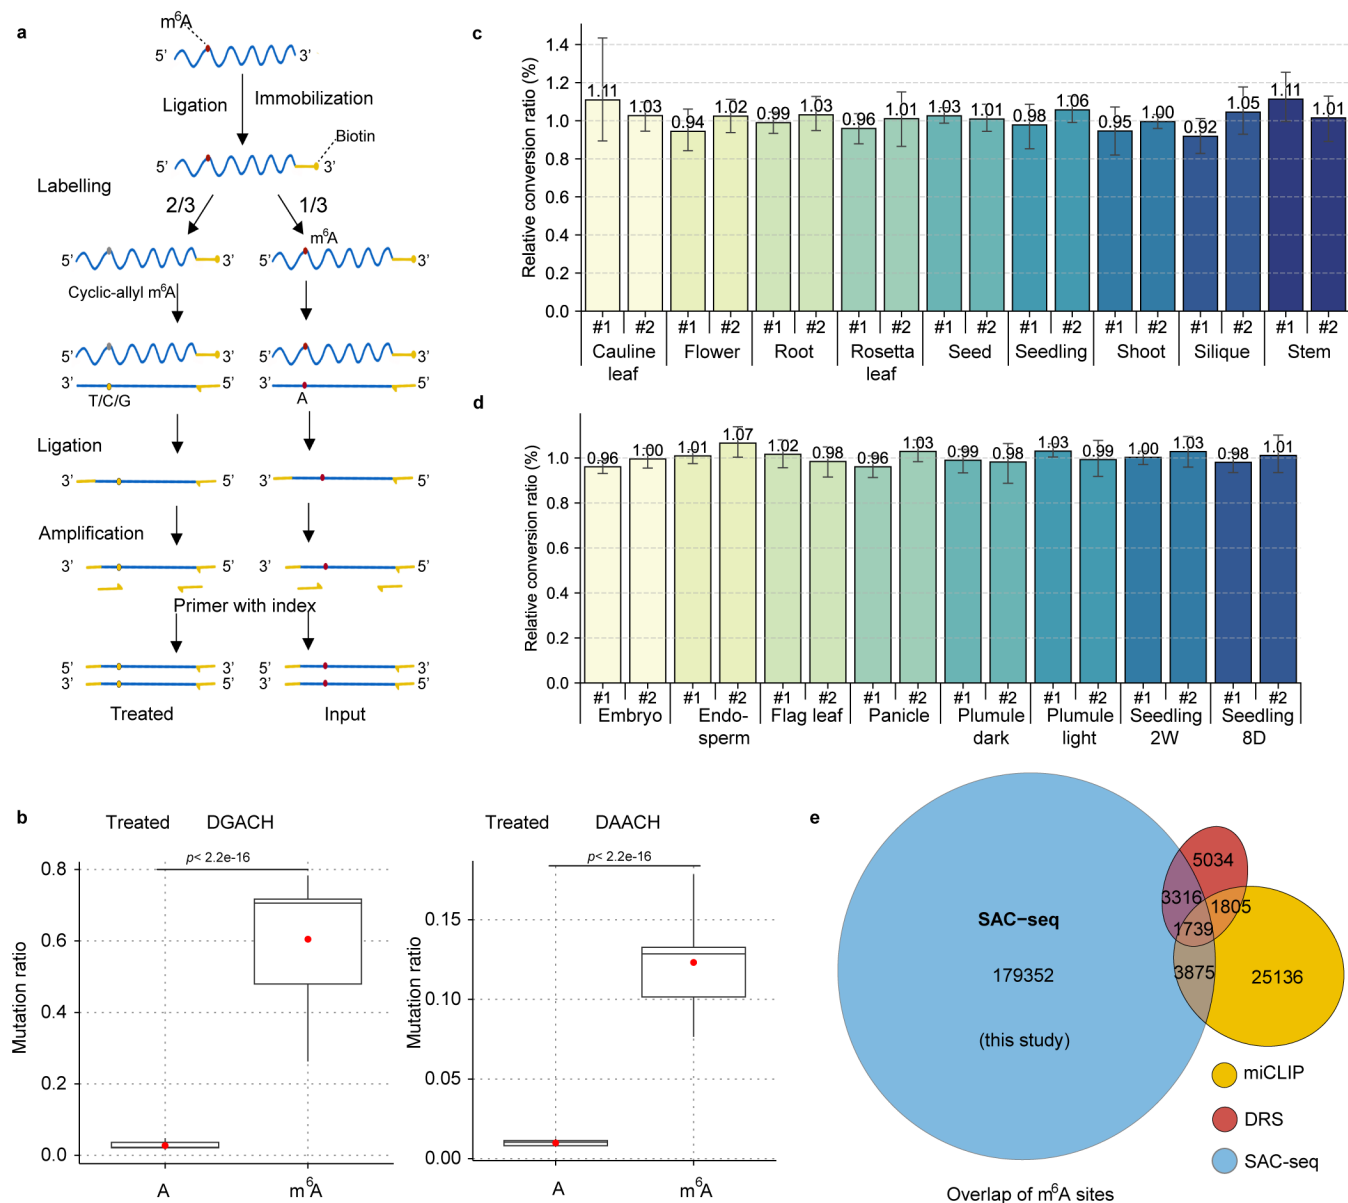

**Supplementary Fig. 1: Overview of the quality of m<sup>6</sup>A-SAC-seq data.**

**a**, The schematic diagram illustrating the m<sup>6</sup>A-SAC-seq protocol. **b**, Mutation ratios of A and m<sup>6</sup>A sites on spike-in probes with different motifs ( $n = 256$ ), in treated (MjDim1 labeled) or untreated samples. The median value was marked as the black line in the box plot. GAC motif showed much higher mutation ratio than AAC motif. The  $P$  value was determined by one-tailed Wilcoxon rank-sum test. **c,d**, The relative conversion ratios in Arabidopsis tissues (**c**) and rice tissues (**d**). Two biological replicates were used. Data are means  $\pm$  SD,  $n = 3$ . **e**, Venn diagram showing the m<sup>6</sup>A sites detected by SAC-seq overlapped with those identified through miCLIP and DRS.

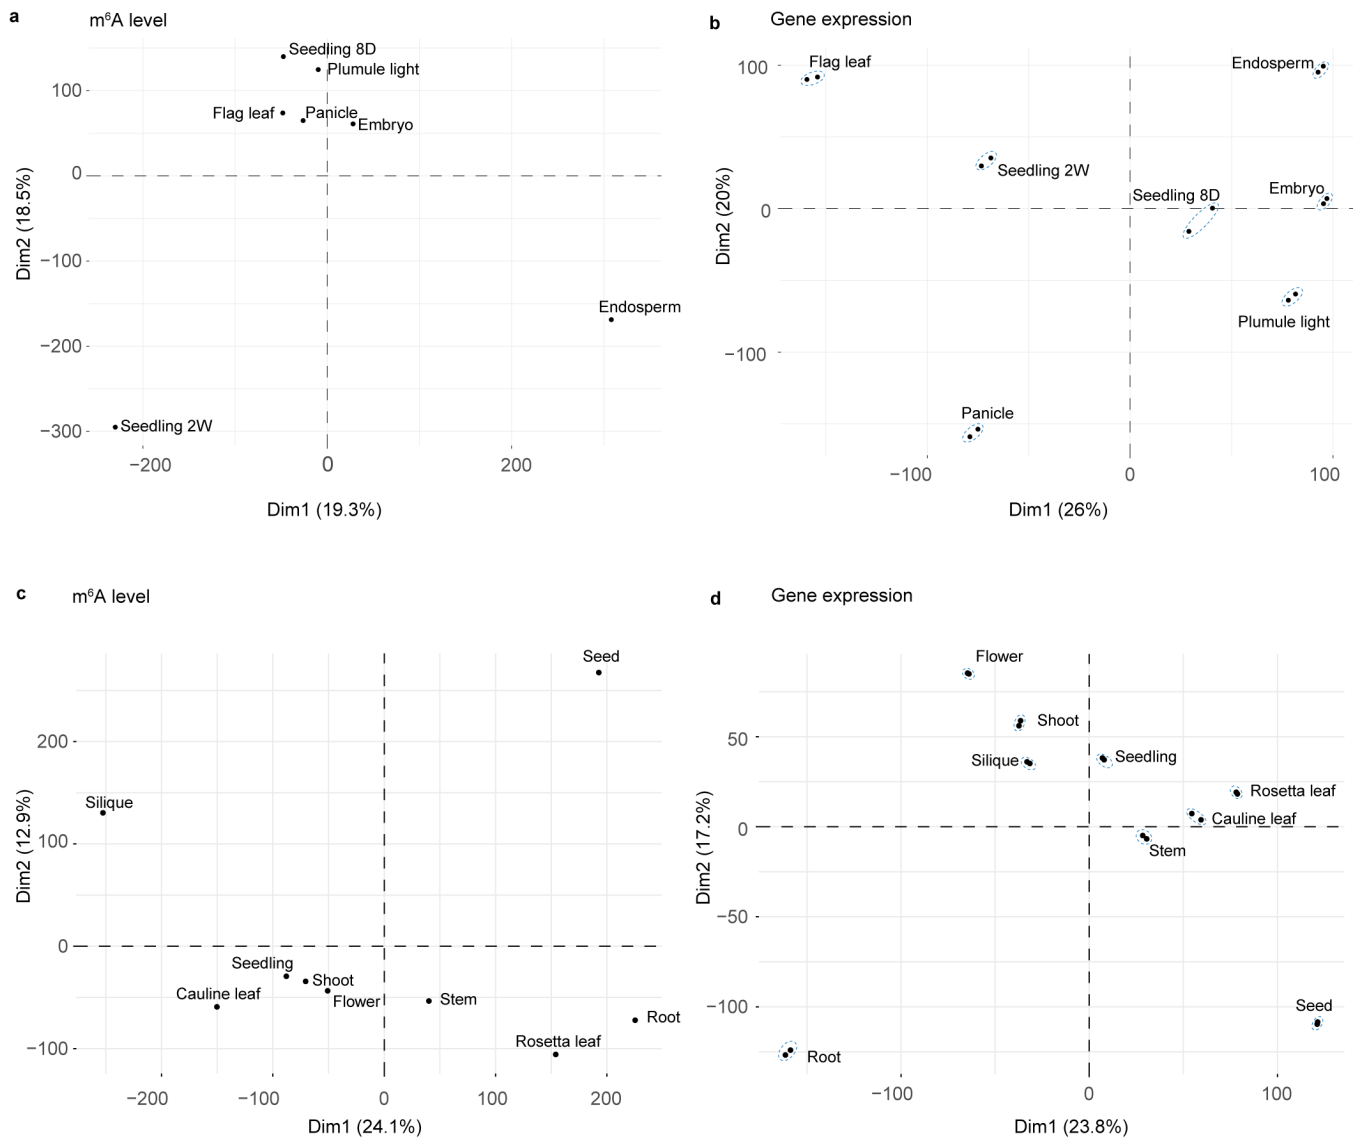

**Supplementary Fig. 2: Principal component analysis (PCA) of m<sup>6</sup>A-SAC-seq data and RNA-seq data. **a,b**, PCA of m<sup>6</sup>A fractions (**a**) and gene expression (**b**) in rice. **c, d**, PCA of m<sup>6</sup>A fractions (**c**) and gene expression (**d**) in *Arabidopsis*.**

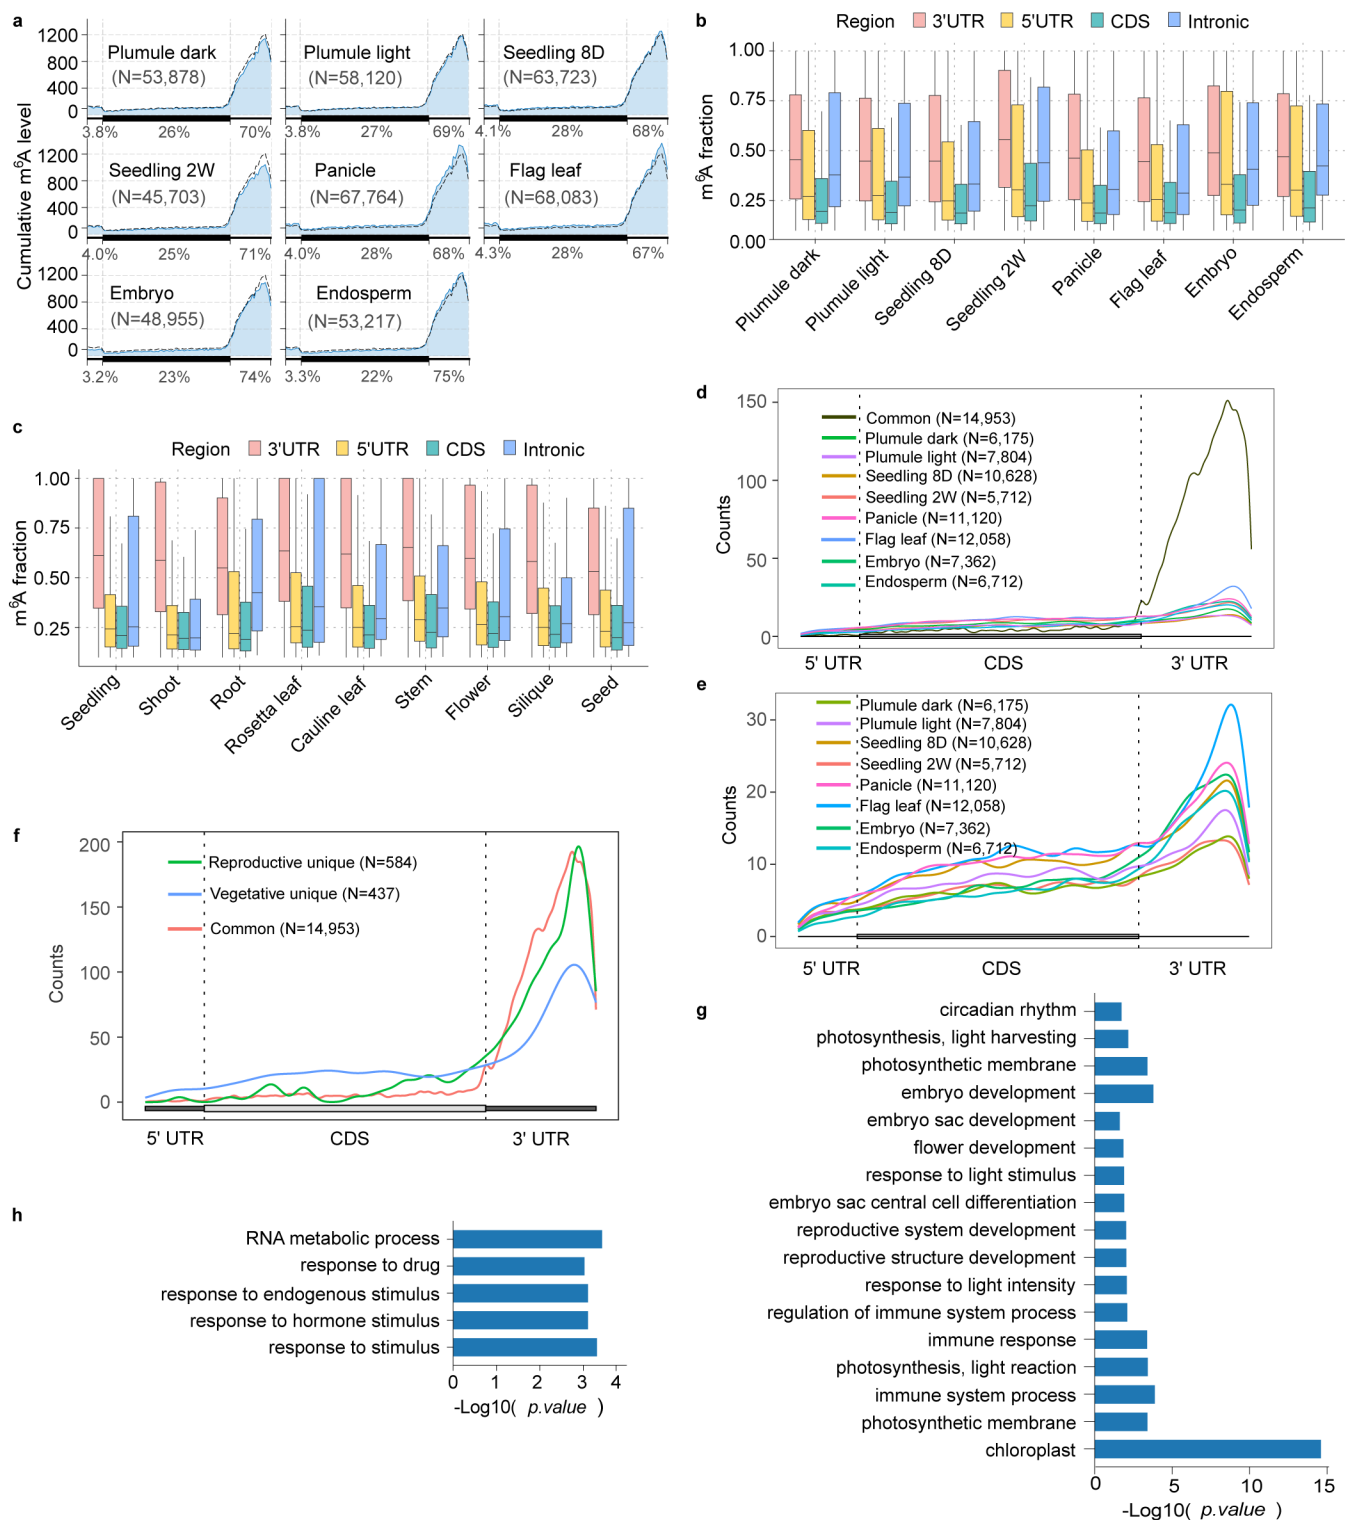

**Supplementary Fig. 3: Tissue-specific m<sup>6</sup>A modification in various tissues of *Arabidopsis*.**

**a**, Metagenes profile showing the m<sup>6</sup>A sites of nine *Arabidopsis* tissues distributed across transcript. The black dash line is the average m<sup>6</sup>A fraction among the nine tissues. The m<sup>6</sup>A site number (N) is indicated in the figure. The percentage of m<sup>6</sup>A fraction distributed in 5' UTR, CDS, and 3' UTR regions within different tissues is shown.

**b, c**, m<sup>6</sup>A fraction in different rice tissues (**b**) and *Arabidopsis* tissues (**c**) as showed in the 5' UTR, CDS, intronic and 3' UTR regions. **d, e**, Metagenes profile showing shared m<sup>6</sup>A sites and tissue unique m<sup>6</sup>A sites among rice tissues distributed across transcript (**d**), and the metagenes profiles of tissue unique m<sup>6</sup>A sites were also displayed separately in (**e**). The m<sup>6</sup>A site number (N) is indicated in the figure. **f**, Metagenes profile showing common-,

reproductive unique- and vegetative unique- m<sup>6</sup>A sites distributed across transcript. Tissues of panicle, embryo and endosperm were combined as the reproductive tissue, while the other tissues were combined as the vegetative tissues. Each transcript is divided into three parts: 5' UTR, CDS and 3' UTR. The m<sup>6</sup>A site number (N) is indicated in the figure. **g**, GO enrichment analysis of genes carrying reproductive unique m<sup>6</sup>A modification sites. **h**, GO enrichment analysis of genes containing vegetative unique m<sup>6</sup>A modifications. For **g** and **h**, One-sided Fisher's exact test. Adjusted *P* values using the linear step-up method.

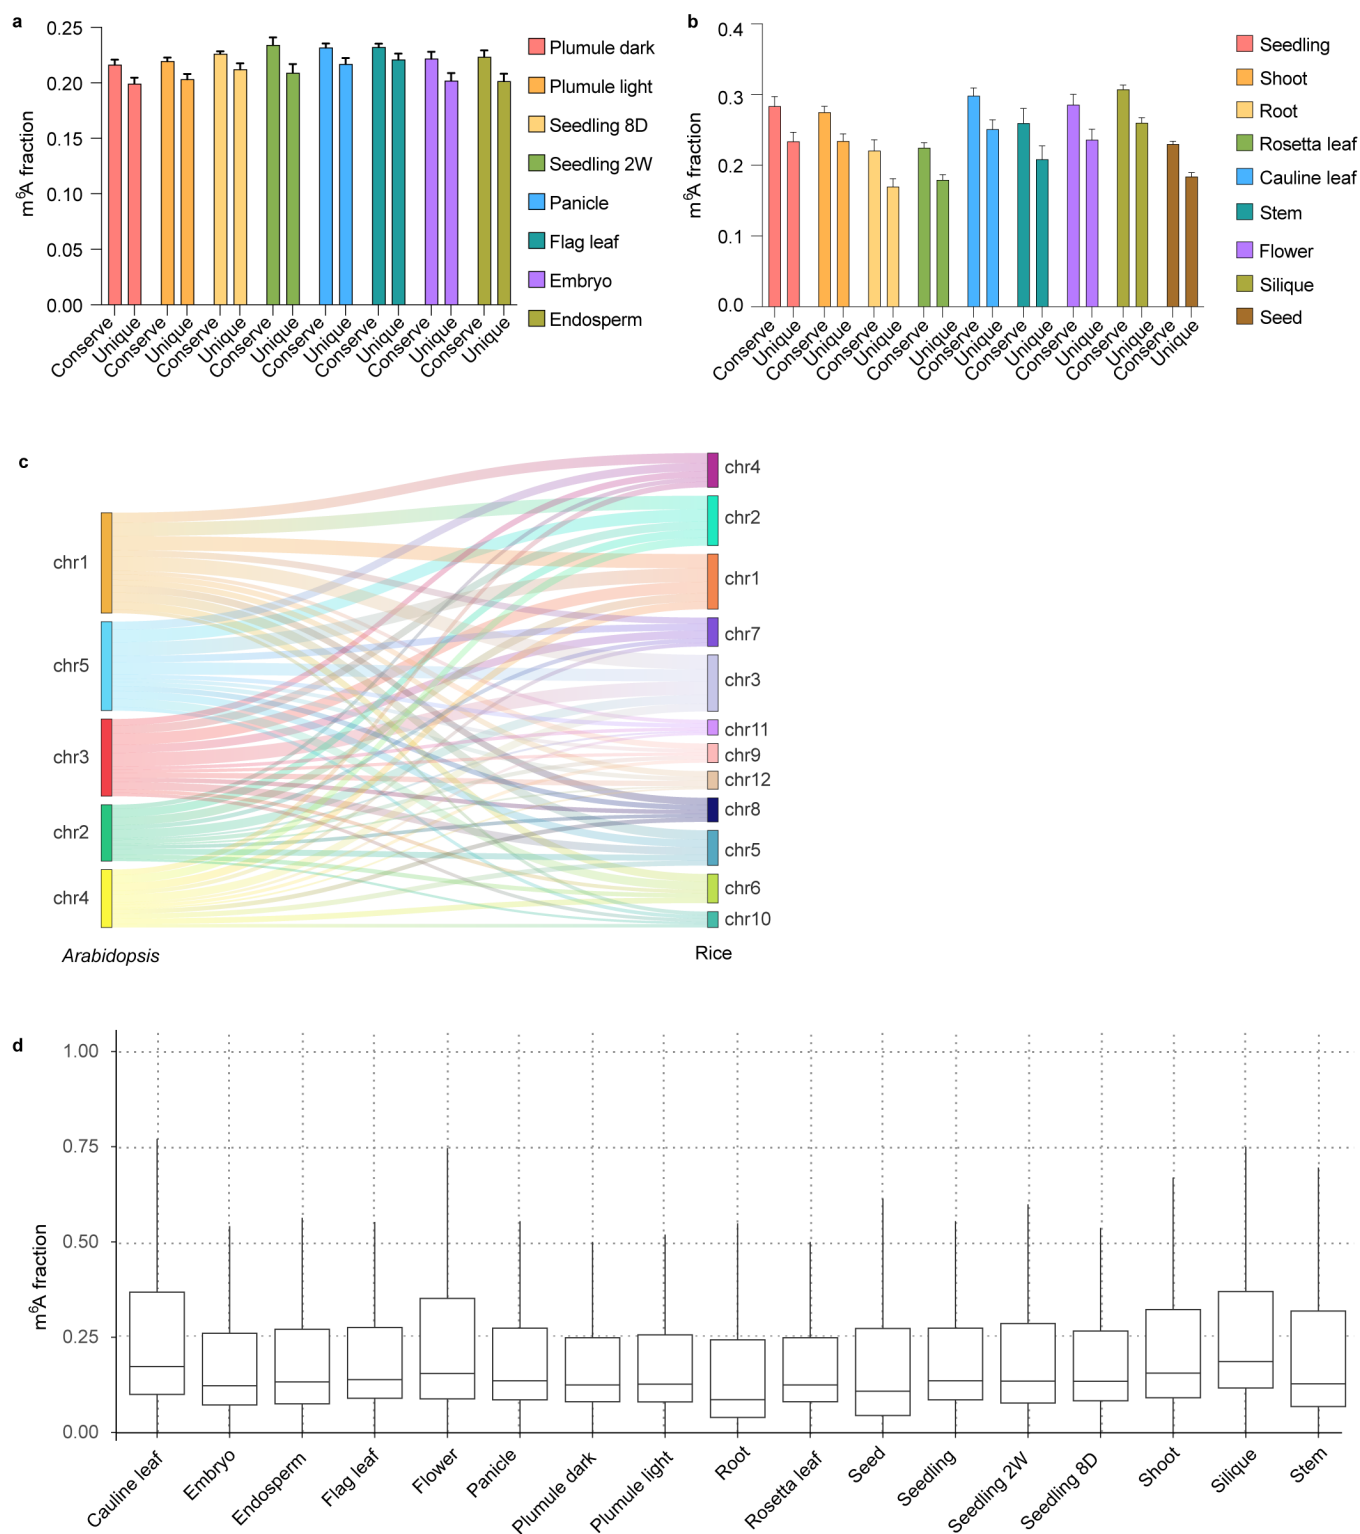

**Supplementary Fig. 4: Conserved m<sup>6</sup>A site pairs across rice and *Arabidopsis* orthologue genes.**

**a**, m<sup>6</sup>A fractions of rice unique sites compared to the rice-*Arabidopsis* conserved sites in rice. Data are means  $\pm$  SD,  $n = 2$ . **b**, m<sup>6</sup>A fractions of *Arabidopsis* unique sites compared to the rice-*Arabidopsis* conserved sites in *Arabidopsis*. Data are means  $\pm$  SD,  $n = 2$ . **c**, Sankey plot showing the correlation of these conserved m<sup>6</sup>A site pairs in orthologue genes of rice and *Arabidopsis*. **d**, m<sup>6</sup>A fractions of these conserved m<sup>6</sup>A site pairs in orthologue genes of rice and *Arabidopsis* within different tissues. In box plots, the center line represents the median. Upper and lower quartiles were the box limits.

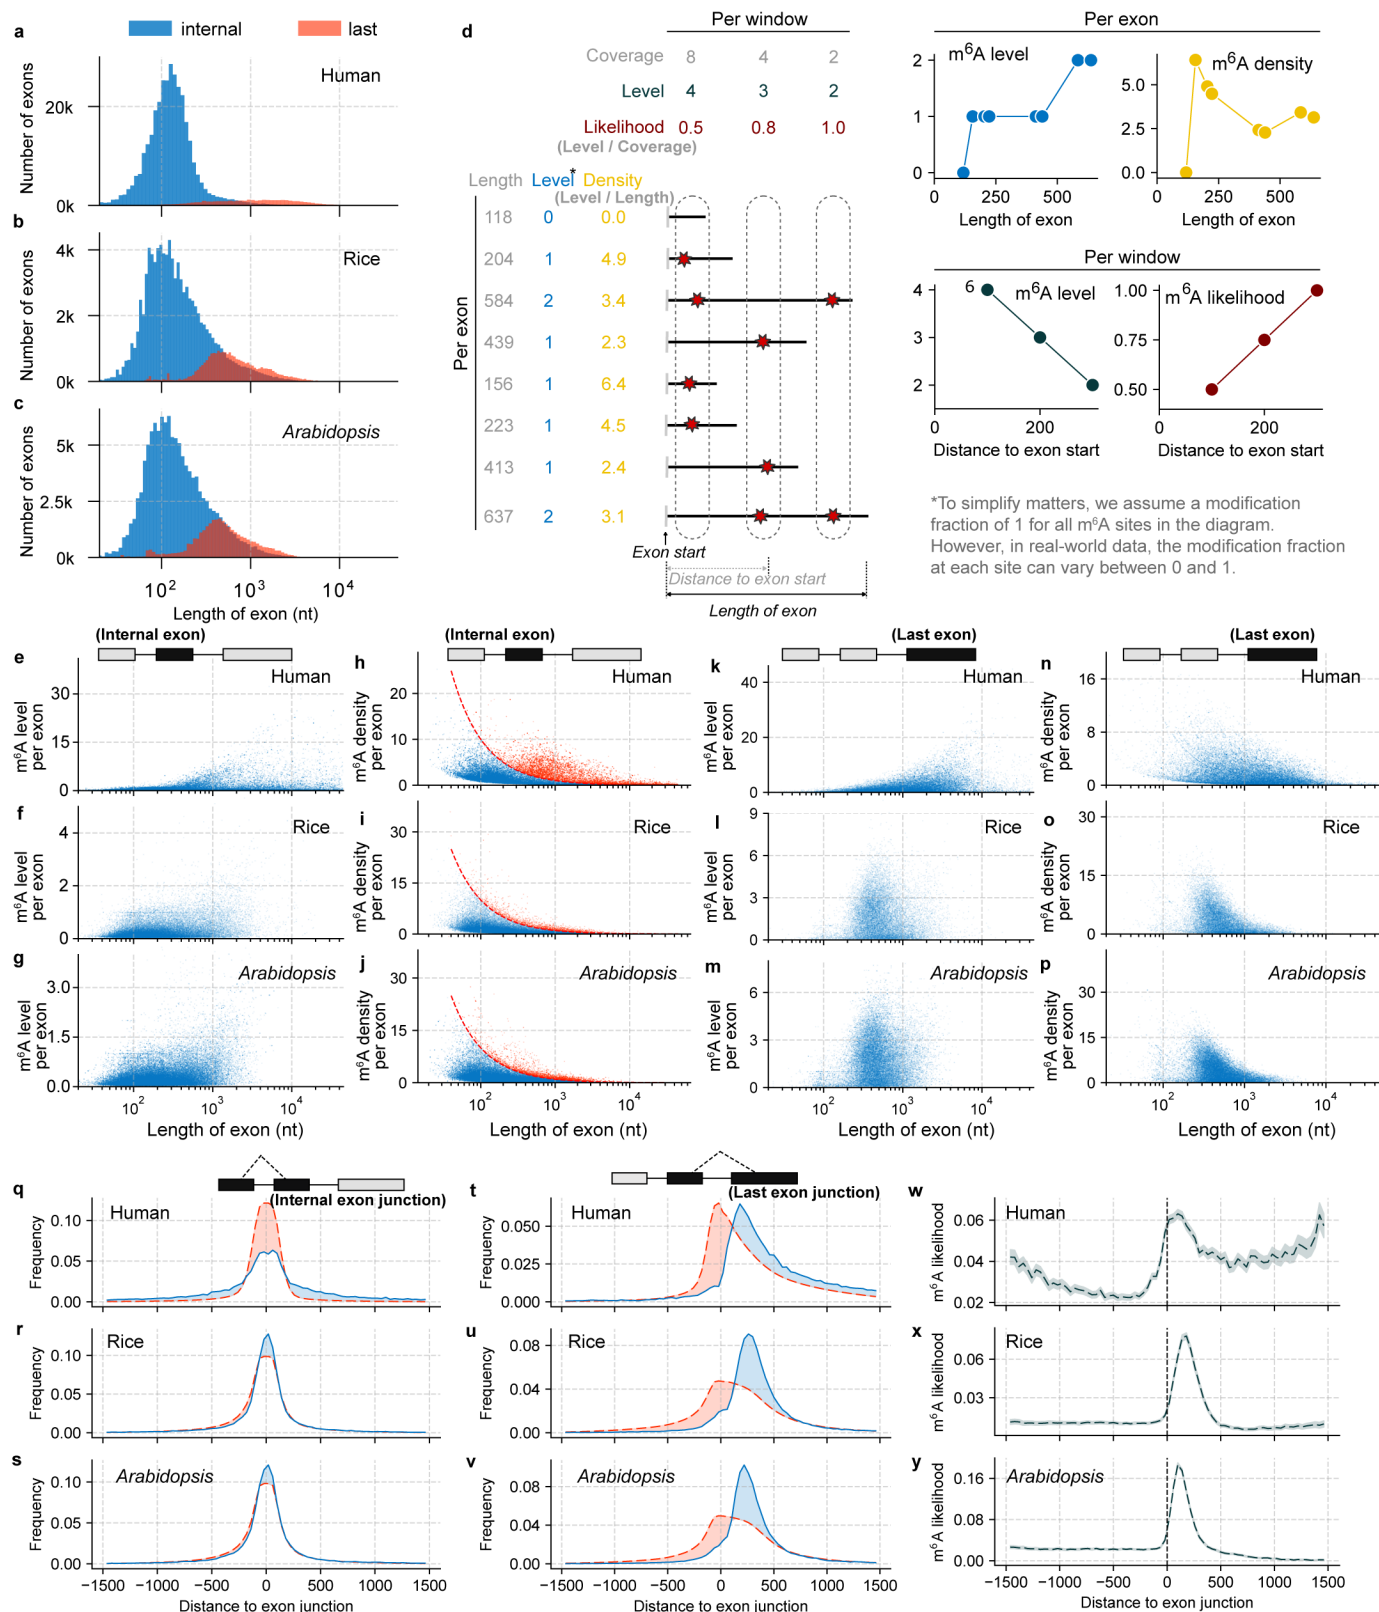

**Supplementary Fig. 5: Detailed analysis of m<sup>6</sup>A levels and exon lengths in plant and mammalian genomes.**  
**a-c**, Average exon lengths in the genomes of human (**a**), rice (**b**) and *Arabidopsis* (**c**) in regarding to last exons and internal exons. **d**, Diagram outlines the definition of 'm<sup>6</sup>A density' per exon and 'm<sup>6</sup>A likelihood' per sliding window. For 'm<sup>6</sup>A density,' the sum of all detected m<sup>6</sup>A sites within each exon is normalized by the exon length. The diagram illustrates that the level of m<sup>6</sup>A per exon may increase with the length of the exon, but the trend in 'm<sup>6</sup>A density' can decrease if the rate of m<sup>6</sup>A accumulation is slower than the rate at which exon length increases.

For 'm<sup>6</sup>A likelihood,' exons are aligned at their junction sites, and the overall 'm<sup>6</sup>A level' for each sliding window, starting from these junction sites, is calculated. The pileup coverage of these aligned exons is also calculated within each sliding window. 'm<sup>6</sup>A likelihood' is then defined as the ratio of the 'm<sup>6</sup>A level' to the exon coverage within the same window. The diagram indicates that 'm<sup>6</sup>A likelihood' may show an increasing trend even if the 'm<sup>6</sup>A level' is increasing at a slower rate than the decrease in exon coverage. **e-g**, m<sup>6</sup>A levels of each internal exon of the human (**e**), rice (**f**) and *Arabidopsis* (**g**) genomes were plotted against exon length. **h-j**, m<sup>6</sup>A density in the internal exons of human (**k**), rice (**l**), and *Arabidopsis* (**m**) transcripts were shown against exon length, represented by blue dots. m<sup>6</sup>A density was calculated as the total modification level of all m<sup>6</sup>A sites within each exon, normalized by exon length and multiplied by 1,000. Long exons with m<sup>6</sup>A density showing unusually elevated levels of m<sup>6</sup>A methylation (level per exon > 1) are highlighted in red. **k-m**, Analysis similar to panels **e-g**, but focusing on m<sup>6</sup>A levels and lengths for last exons. **n-p**, Similar to panel **h-j**, but the m<sup>6</sup>A density in last exons were shown. **q-s**, Frequency distribution of cumulative exon coverage relative to the internal exon junction sites was plotted in red line, and the frequency distribution of cumulative modification levels for all m<sup>6</sup>A sites were plotted in blue line. Regions where exon coverage exceeds m<sup>6</sup>A levels in frequency are shaded in red, and the opposite is shaded in blue. **t-v**, Analysis similar to panels **q-s**, but focusing on the last exons. **w-y**, Distribution of m<sup>6</sup>A site deposition likelihood near the stop codon in human (**w**), rice (**x**), and *Arabidopsis* (**y**) transcripts. Data are presented as median values.

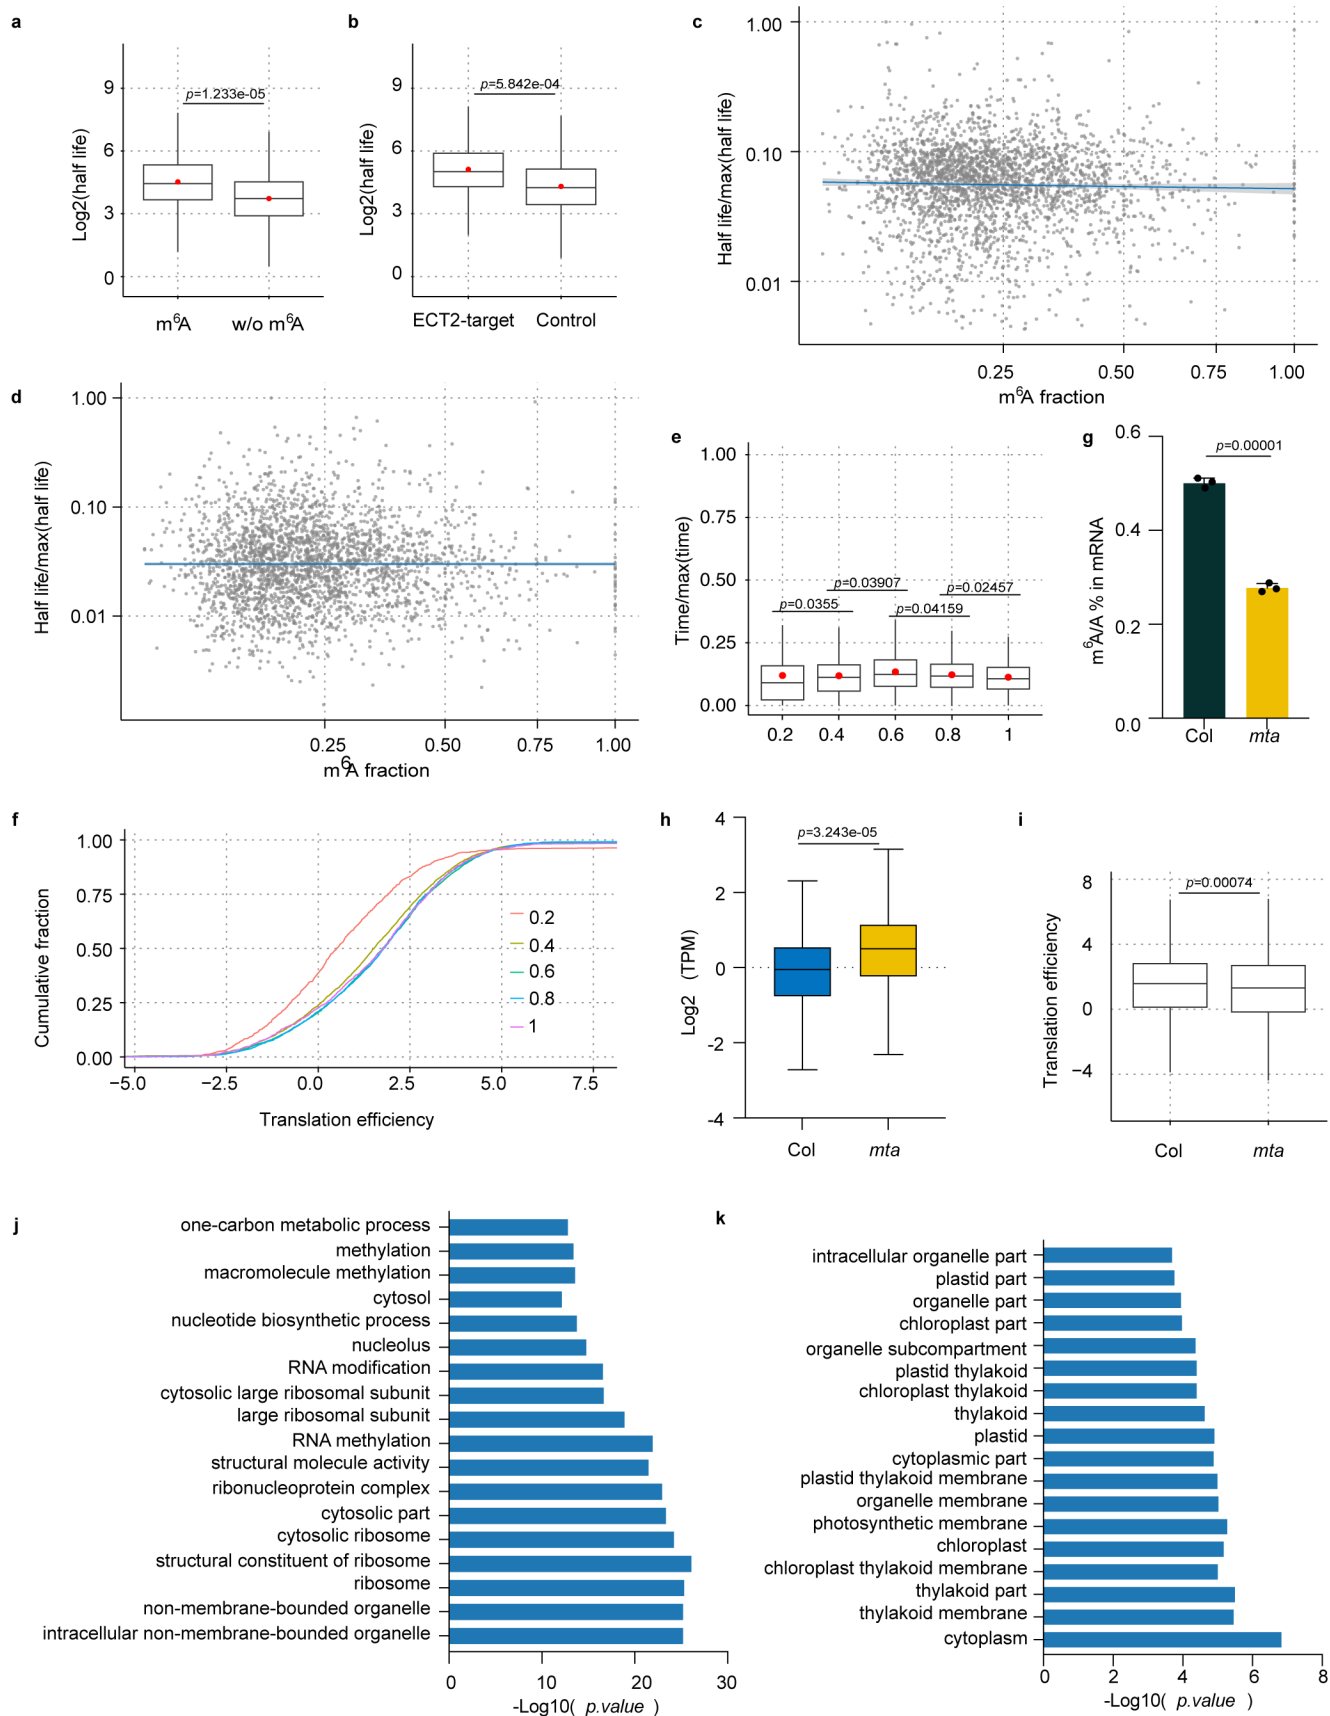

**Supplementary Fig. 6: Effects of m<sup>6</sup>A on the modified RNAs.**

**a**, m<sup>6</sup>A modified transcripts showed higher lifetime than the unmodified transcripts. m<sup>6</sup>A, n = 7,77; w/o m<sup>6</sup>A, n = 3,319; **b**, higher lifetime of ECT2 targets with m<sup>6</sup>A modification than those not targeted by ECT2. ECT2-



target, n=584; Control, n=13,944. **c**, No significant correlation of non-3' UTR m<sup>6</sup>A modification levels with mRNA lifetime showed in scatter plot. **d**, Scatter plot showing correlation of non-3' UTR m<sup>6</sup>A modifications with mRNA lifetime using mRNA decay data set GSE118462. **e**, Box plots showing the lifetime distribution of 3' UTR m<sup>6</sup>A modification with mRNA lifetime using mRNA decay data set GSE118462. Transcripts were grouped into five categories (0,0.2); (0.2, 0.4); (0.4, 0.6); (0.6, 0.8); and (0.8, 1)) based on the sum of their m<sup>6</sup>A fractions. (0,0.2), n=76; (0.2, 0.4), n=265; (0.4, 0.6), n=463; (0.6, 0.8), n=588; (0.8, 1), n=710. **f**, Correlation of transcripts modified by non 3'UTR m<sup>6</sup>A sites with translation efficiency. Transcripts were grouped into five categories (0,0.2); (0.2, 0.4); (0.4, 0.6); (0.6, 0.8); and (0.8, 1)) based on the sum of their m<sup>6</sup>A fractions. (0,0.2), n=1,003; (0.2, 0.4), n=4,319; (0.4, 0.6), n=4,819; (0.6, 0.8), n=2,415; (0.8, 1), n=1,418. The *Arabidopsis* seedling translation efficiency data set [GSE206292](#) was used for the analysis. **g**, *Arabidopsis mta* mutant showed significant reduced mRNA m<sup>6</sup>A levels. The m<sup>6</sup>A-to-A ratio was determined using calibration standards. Data are means  $\pm$  SD,  $n=3$ . Student t-test was used to determine the statistic difference. **h**, Transcript levels of genes associated with reduced m<sup>6</sup>A modifications in *mta* mutant compared with the wild type (Col). **i**, Translation efficiency of *mta* mutant was reduced on average. Translation efficiency data set [GSE206292](#) was used for the analysis. **j**, GO enrichment analysis of genes with upregulated translation efficiency mediated by MTA. **k**, GO enrichment analysis of genes with downregulated translation efficiency mediated by MTA. For **j** and **k**, One-sided Fisher's exact test. Adjusted *P* values using the linear step-up method. For **a**, **b**, and **e-i**, the *P* value was determined by one-tailed Wilcoxon rank-sum test. For box plots of **a**, **b**, **e**, **h**, and **i**, the center line represents the median, and the red dot represents the mean. Upper and lower quartiles were the box limits.

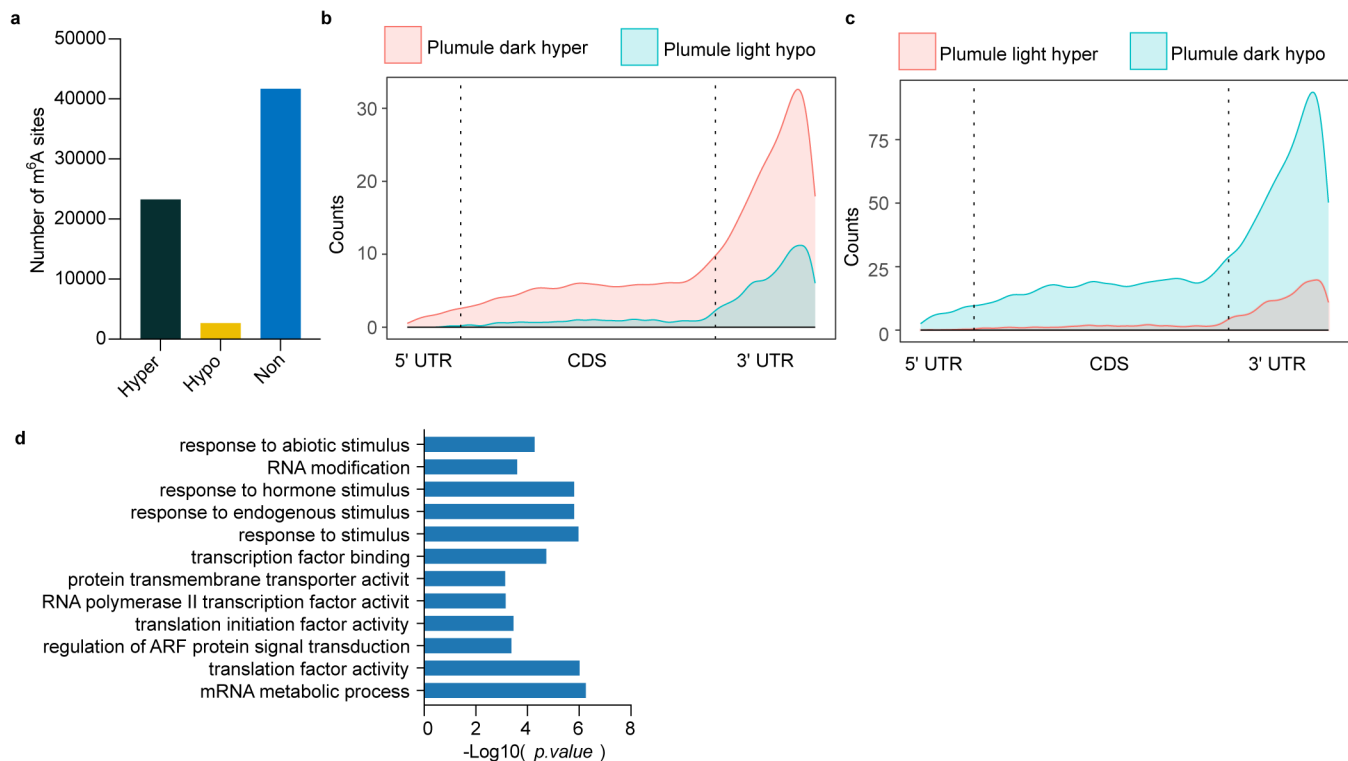

**Supplementary Fig. 7: Light responsive m<sup>6</sup>A modification in rice and MTA regulated m<sup>6</sup>A sites in *Arabidopsis*.**

**a**, Number of hypermethylated (hyper) and hypomethylated (hypo) m<sup>6</sup>A sites in rice induced by light. **b,c**, Metagene profile showing hypermethylated- (**b**) and hypomethylated (**c**) m<sup>6</sup>A sites induced by light distributed across transcript. Each transcript is divided into three parts: 5' UTR, CDS and 3' UTR. **d**, GO enrichment analysis of genes containing hypermethylated m<sup>6</sup>A sites induced by light. One-sided Fisher's exact test. Adjusted *P* values using the linear step-up method.
