# Supplementary material for: Quantitative profiling of m6A at single base resolution across the life cycle of rice and Arabidopsis
Source: Springer Nature journal article supplement (doi:10.1038/s41467-024-48941-7), 2024-06-07
Supplement: MOESM2 [file 41467_2024_48941_MOESM2_ESM.pdf › 41467_2024_48941_MOESM2_ESM.pdf]

## **Description of Additional Supplementary Files**

**Supplementary Data 1** - Reproductive unique-, vegetative unique- and conserved m6a sites among rice tissues

**Supplementary Data 2** - rice and arabidopsis conserved m6a sites

**Supplementary Data 3** - rice and arabidopsis conserved m6a motif
