# Supplementary material for: Quantitative profiling of m6A at single base resolution across the life cycle of rice and Arabidopsis
Source: Nat Commun. 2024 Jun 7;15:4881. doi: 10.1038/s41467-024-48941-7 (PMC11161662; doi:10.1038/s41467-024-48941-7)
Supplement: Supplementary file 7 — Source Data [file 41467_2024_48941_MOESM7_ESM.xlsx]

## Sheet: Fig.1
Fig. 1c	m6A-to-A ratio										Fig. 1d	m6A-to-A ratio									Fig. 1f
		seedling	shoot	root	rosetta leaf	cauline leaf	stem	flower	silique	seed		plumule dark	plumule light	Seedling_8DAA	Seedling_2W	panicle	flag leaf_10DAA	endosperm_10 DAA	embryo_10 DAA		Overlapped m6A sites in diiferent method	percentage (%)
	Replicate1	0.544436	0.571658	0.518125	0.499342	0.663448	0.597344	0.819992	0.660963	0.371483		0.569671	0.577489	0.615164	0.555164	0.646064	0.648298	0.515086	0.57657		DRS vs SAC-seq	91.7
	Replicate2	0.49043	0.514952	0.499082	0.469338	0.600736	0.547548	0.71633	0.613176	0.359285		0.579216	0.56316	0.591751	0.531751	0.599475	0.655456	0.515693	0.590165		miCLIP vs SAC-seq	44.8
	Replicate3	0.591497	0.621072	0.515121	0.48443	0.631369	0.587634	0.802824	0.665279	0.35816		0.574657	0.601904	0.592401	0.532401	0.661854	0.645826	0.514407	0.560275		DRS vs miCLIP	47.6
	Replicate4	0.549185	0.576644	0.531697	0.468053	0.584507	0.570812	0.687798	0.597644	0.349314		0.572273	0.605667	0.576223	0.516223	0.621852	0.657723	0.510787	0.566858
	Replicate5	0.606251	0.636564	0.49252	0.481803	0.644852	0.580964	0.803488	0.587192	0.35658		0.590465	0.608642	0.595853	0.535853	0.625645	0.656841	0.550504	0.573107
	Replicate6	0.552765	0.580403	0.499664	0.461305	0.581567	0.558585	0.687973	0.594125	0.365502		0.577049	0.615406	0.575747	0.515747	0.611163	0.654826	0.541088	0.592089

## Sheet: Fig. 3
Fig. 3b			Fig. 3e
Motif type	Motif number		GO terms	log10 (p value)
AAA	3		flower development	10.4101
RAC	5323		shoot development	12.1198
GAT	1686		embryo development	15.129
AAG	163		leaf development	9.88941
AAT	64		root development	9.54363
CAC	2		ovule development	9.34199
GAA	40		shoot morphogenesisss	12.3242
GAG	270		photomorphogenesis	8.14146
TAC	140		chloroplast	69.0482
TAG	37		photosynthesis	7.36957
TAT	5		response to salt stress	30.433
			response to stimulus	73.9586
			response to abiotic stimulus	62.1858
			response to osmotic stress	47.3089
			response to biotic stimulus	51.8665
			response to light stimulus	10.8697
			response to temperature stimulus	19.6778
			immune response	12.4485
			response to red or far red light	11.5935
			response to cold	11.2262
			defense response	9.80134

## Sheet: Fig. 5
Fig. 5e				Fig. 5f
	GO terms	log10 (p value)			GO terms	log10 (p value)
	mitochondrion organization	4.03			response to hypoxia	3.14569
	translation	5.84			response to salicylic acid	3.87943
	peptide biosynthetic process	5.97			plant organ senescence	1.53165
	ribosome biogenesis	2.91			response to red or far red light	2.52724
	gene expression	13.8			response to fungus	11.1765
	RNA processing	5.47			response to bacterium	10.9245
	RNA metabolic process	21.4			response to salt	11.5528
	nitrogen compound metabolic process	32.2			response to jasmonic acid	3.12726
	primary metabolic process	21.7			leaf development	1.63451
					cellular response to hormone stimulus	6.057
					response to abscisic acid	6.38828
					response to hormone	15.3925
					hormone-mediated signaling pathway	2.32422
					response to light stimulus	10.556
					shoot system development	3.51145
					tissue development	2.82391
					plant organ development	2.9431

## Sheet: Fig. 6
Fig. 6b
	GO terms	log10 (p value)
	plastid	13.4698
	chloroplast	12.5376
	response to stimulus	11.3507
	plasma membrane	9.57675
	Golgi apparatus	9.34199
	chloroplast part	6.67162
	response to stress	6.31876
	post-embryonic development	6.22475
	vacuole	5.81248
	reproductive structure development	5.08619
	mitochondrial part	4.25649
	mitochondrial inner membrane	4.14752
	endoplasmic reticulum	4.14267
	response to salt stress	3.91364
	response to light stimulus	3.53611
	thylakoid	3.45593
	photosynthetic membrane	3.44733
	chloroplast thylakoid membrane	3.21467
	plastid thylakoid membrane	3.18709
	chloroplast thylakoid	3.18177
	chloroplast envelope	2.98297

## Sheet: Fig. 7
Fig. 7c					Fig. 7d
		CRY1 m6A fraction				CRY1 TPM
		col	mta				col		mta
	Replicate1	0.203828	0.108308			RNA-seq	6.59564	6.45922	7.12186	5.7933
	Replicate2	0.216132	0.110736			Ribo-seq	96.2838	96.6487	55.0902	58.2075
